# Supplementary material for: Interspecies interactions induce exploratory motility in Pseudomonas aeruginosa
Source: eLife. 2019 Nov 12;8:e47365. doi: 10.7554/eLife.47365 (PMC6910820; doi:10.7554/eLife.47365)
Supplement: Source data 1. [file elife-47365-data1.xlsx]

## Sheet: Figure 4B
Figure 4B
Each data point represents a biological replicate, derived from the average of three technical replicate (Motility Diameter, mm)
Biological Replicate	TSB	WT	WT (1/2)	WT (1/4)	ΔsigB	ΔsigB(1/2)	ΔsigB(1/4)	Δagr	Δagr (1/2)	Δagr (1/4)
1	13	43	35	38	62	40	20	15	11	11
2	12	50	40	21	32	28	28	16	16	16
3	13	51	38	28	60	40	18	14	14	14
4	13	43	35		45			15	11
5	13	45	31		25			16	16
6	14	37	31		58			14	14

## Sheet: Figure 4C
Figure 4C
Each data point represents a biological replicate, derived from the average of three technical replicate (Motility Diameter, mm)
Biological Replicate	TSB	WT	ΔagrBCDA	ΔagrBCDA + WT agrBCDA
1	6	48	15	50
2	9	25	15	40
3	14	40	12.5	40

## Sheet: Figure 4D
Figure 4D
Each data point represents a biological replicate, derived from the average of three technical replicate (Motility Diameter, mm)
	Medium (TSB)				WT sup (0.5)
Biological Replicate	WT	flgK	pilA	pilA flgK	WT	flgK	pilA	pilA flgK
1	8.7	6.7	4	2	30	30	23.3	4.2
2	8	7.8	1.7	1.3	37.5	23.7	15	4.2
3	11.3	11.5	2.3	1.7	30	19.7	20	3.3
4		12.2				34.5
5		12.2				22.8

## Sheet: Figure 4E
Figure 4E
Each data point represents a biological replicate, derived from the average of three technical replicate (Motility Diameter, mm)
	Medium (TSB)				WT sup (0.5)
Biological Replicate	WT	flgK	pilA	pilA flgK	WT	flgK	pilA	pilA flgK
	33	30	17	13	35	32	20	11
	32	33	15	15	35	60	20	15
	30	32	15	8	40	45	17	12
	33	30	15		40	35	19

## Sheet: Figure 6 - sup 1
Figure 6 - figure supplement 1
Each data point represents a biological replicate, derived from the average of three technical replicate (Motility Diameter, mm)
	Medium (TSB)				WT sup (0.5)
Biological Replicate	WT	ΔpilA	ΔpilJ	ΔpilG	WT	ΔpilA	ΔpilJ	ΔpilG
1	11.3	6.7	6	7	50.7	39.2	24.3	40.5
2	9.3	3.3	7	6.7	43.3	18.7	30	25.3
3	14.8	8.5	3.5	7.2	45.2	37.7	29.8	22.8

## Sheet: Figure 7A
Figure 7A
Each data point represents a biological replicate, derived from the average of three technical replicate (Motility Diameter, mm)
	Medium (TSB)					USA300 LAC
Biological Replicate	PA14	CFBR PA 38	CFBR PA 43	CFBR PA 44	CFBR PA 37	PA14	CFBR PA 38	CFBR PA 43	CFBR PA 44	CFBR PA 37
1	12	7	0	8	0	45	3	30	45	16
2	13	1	0	9	0	40	20	17	45	20
3	12	9	0	10	0	42	16	15	32	12

## Sheet: Figure 7B
Figure 7B
Each data point represents a biological replicate, derived from the average of three technical replicate (Motility Diameter, mm)
Biological Replicate	PA14	USA300LAC	CFBRSA47	CFBRSA48	CFBRSA50
1	12	45	55	16	32
2	13	40	57	15	38
3	12	42	30	17	30

## Sheet: Figure 7C
Figure 7C
Each data point represents a biological replicate, derived from the average of three technical replicate (Motility Diameter, mm)
Biological Replicate	TSB	LB	BHI + Fildes	USA300 LAC	CFUI HI 01	CFUI HI 02	CFUI BC 02	CFUI BC 03	CFUI AX 01
1	13.6667	15.6667	23.8333	47.6667	18.8333	20.3333	35	16.1667	15.3333
2	11.5	13	14.5	30	16	15.3333	32.5	17	12.1667
3	11.3333	13.1667	12.6667	49.1667	15	16.8333	54.5	11.6667	10.5

## Sheet: Figure 7D
Figure 7D
Each data point represents a biological replicate, derived from the average of three technical replicate (Motility Diameter, mm)
Biological Replicate		TSB	JE2	DHB4	B/rA	PY79	3610	S. Typhimurium LT2
	1	11.3333	37.3333	20.8333	18.6667	13.3333	53.8333	22.8333
	2	14.5	52.5	18.6667	28.3333	14.5	50.8333	22.6667
	3	13.25	42.1667	21.8333	30.6667	15.8333	34.8333	25.3333
	4	14.8333	45.1667
	5	15.5	53.75
	6	13.1667	47

## Sheet: Figure 8A
Figure 8A
Each data point represents a biological replicate, derived from the average of three technical replicate (Motility Diameter, mm)
Biological Replicate		Medium	Untreated	Heat	TSB + PK	sup + PK	TSB + tryp	sup + tryp
	1	23	44	72	20	26	20	22
	2	24	64	75	15	24	19	20
	3	23	60	68	18	19	19	24

[truncated: 2 more sheets: Figure 8B, Figure 8C]
